# Supplementary material
Source: PubMed Central journal article supplement (PMC6300315)
Supplement: ab8b00894_si_001.pdf [file ab8b00894_si_001.pdf]

## Supplementary Dataset (Supplementary Tables S1 ~ S4)

### Organotypic 3D Culture in Nanoscaffold Microwells Supports Salivary Gland Stem Cell-based Organization

<sup>1</sup>Hyun-Soo Shin, <sup>2</sup>Hye Jin Hong, <sup>2\*</sup>Won-Gun Koh, <sup>1\*</sup>Jae-Yol Lim

<sup>1</sup>Department of Otorhinolaryngology, Yonsei University College of Medicine; <sup>2</sup>Department of Chemical and Biomolecular Engineering, Yonsei University, Seoul, Republic of Korea

\*These authors contributed equally to this work.

#### \*Corresponding author:

Won-Gun Koh, PhD, Department of Chemical & Biomolecular Engineering, Yonsei University, 50 Yonsei-Ro, Seodaemoon-Gu, Seoul 4242, South Korea

Email: wongun@yonsei.ac.kr, Tel: +82-2-2123-5755, Fax: +82-2-312-6401

Jae-Yol Lim, MD, PhD, Department of Otorhinolaryngology, Gangnam Severance Hospital, Yonsei University College of Medicine, 211 Eonju-ro, Gangnam-gu, Seoul 06273, Republic of Korea

E-mail: jyylimd@yuhs.ac, Tel: 82-2-2019-3460, Fax: 82-2-3463-4750



### Supplementary Table S1. Primers used for RT-PCR

| Gene and symbol                                                      |   | Primer sequences (5'-3')  |
|----------------------------------------------------------------------|---|---------------------------|
| Lipoprotein lipase (LPL)                                             | F | TACAGGGCGGCCACAAGTTTT     |
|                                                                      | R | ATGGAGAGCAAAGCCCTGCTC     |
| Fatty acid binding protein 4 (FABP4)                                 | F | CATCAGTGTGAATGGGGATG      |
|                                                                      | R | GTGGAAGTGACGCCTTTCAT      |
| Peroxisome proliferator activated receptor gamma 2 (PPAR $\gamma$ 2) | F | GACCACTCCCCTCCTTTGA       |
|                                                                      | R | CGACATTCAATTGCCATGAG      |
| Runt-related transcription factor 2 (RUNX2)                          | F | TATGAAAAACCAAGTAGCAAGGTTC |
|                                                                      | R | GTAATCTGACTCTGTCCTTGTGGAT |
| Bone gamma-carboxyglutamate(gla) protein (BGLAP)                     | F | GTGCAGAGTCCAGCAAAGGT      |
|                                                                      | R | CTAGCCAACCTCGTCACAGTC     |
| Aggrecan (ACAN)                                                      | F | GCTACACCCTAAAGCCACTGCT    |
|                                                                      | R | CGTAGTGCTCCTCATGGTCATC    |
| Collagen II (COL2)                                                   | F | TTTCCCACCTCAAGATGGTC      |
|                                                                      | R | TCACCTGGTTTTCCACCTTC      |
| Collagen X (COL10)                                                   | F | GCCCAAGAGGTGCCCTGGAATAC   |
|                                                                      | R | CCTGAGAAAGAGGAGTGGACATAC  |
| Glyceraldehyde 3-phosphate dehydrogenase (GAPDH)                     | F | ATGGGGAAGGTGAAGGTCG       |
|                                                                      | R | TAAAAGCAGCCCTGGTGACC      |

**Supplementary Table S2. Primers used for Real-time PCR**

| <b>Gene and symbol</b>                                             |   | <b>Primer sequences (5'-3')</b> |
|--------------------------------------------------------------------|---|---------------------------------|
| $\alpha$ -Amylase (AMY1A)                                          | F | CATTGACATTGGCGTAGCAG            |
|                                                                    | R | CAGAATGTCAAGATGGATGC            |
| Aquaporin 5 (AQP5)                                                 | F | CTCTGCATCTTCTCCTCCACG           |
|                                                                    | R | TCCTCTCTATGATCTTCCCAG           |
| ZO-1 (TJP1)                                                        | F | CGGTCCTCTGAGCCTGTAAG            |
|                                                                    | R | GGATCTACATGCGACGACAA            |
| E-Cadherin (CDH1)                                                  | F | CGCATTGCCACATACTACTCT           |
|                                                                    | R | TTGGCTGAGGATGGTGTAAG            |
| Cytokeratin 7 (KRT7)                                               | F | CAGGATGTGGTGGAGGAC              |
|                                                                    | R | AACTTGGCACGCTGGTTCT             |
| Cytokeratin 18 (KRT18)                                             | F | GGAGGCTGGAGAGCAAAATC            |
|                                                                    | R | AGTCATCAGCAGCAAGACGG            |
| NHE1                                                               | F | GGCGGTGAGCAGATCAACAA            |
|                                                                    | R | CAAGGATGTGCAGCAGCTCA            |
| SLC26C                                                             | F | CTGTGTGCCTCAAGAGCCTG            |
|                                                                    | R | CTCAAGCTGGCTGACCACAG            |
| Cytokeratin 5 (CK5)                                                | F | CCCAGTATGAGGAGATTGCCAACC        |
|                                                                    | R | TATCCAGAGGAAACACTGCTTGTG        |
| CD24 (HSA)                                                         | F | ATGGGCAGAGCAATGGTGGCCA          |
|                                                                    | R | AGAGTGAGACC ACGAAGAGACT         |
| CD29 (ITGB1)                                                       | F | GAAGGGTTGCCCTCCAGA              |
|                                                                    | R | GCTTGAGCTTCTCTGCTGTT            |
| CD90 (THY1)                                                        | F | GACAGCCTGAGAGGGTCTTG            |
|                                                                    | R | CCCAGTGAAGATGCAGGTTT            |
| Leucine-rich repeat containing G protein-coupled receptor 5 (LGR5) | F | AGGATCTGGTGGAGCTGAGAA           |
|                                                                    | R | CATAAGTGATGCTGGAGCTGGTAA        |
| Nanog                                                              | F | CAGAAAAACAACCTGGCCGAA           |
|                                                                    | R | GGCCTGATTGTTCCAGGATT            |
| POU5F1 (OCT4)                                                      | F | CTTGATCCTCGGACCGGCTA            |

|                   |   |                       |
|-------------------|---|-----------------------|
|                   | R | GGTTGCCTCTCACTCGGTTCT |
| Sox2              | F | CAACATGATGGAGACGGAGC  |
|                   | R | GTGCATCTTGGGGTTCTCCT  |
| Beta-actin (ACTB) | F | AGCTGTGCTATGTTGCCCTG  |
|                   | R | AGGAAGCAAGGCTGGAAGAG  |

**Supplementary Table S3. Antibodies Used in This Study (Immunofluorescence analysis)**

| <b>Antibody</b>                                              | <b>Vendor</b>               | <b>Product number</b> |
|--------------------------------------------------------------|-----------------------------|-----------------------|
| Amylase                                                      | Santa Cruz<br>Biotechnology | SC-46657              |
| Cytokeratin7                                                 | Santa Cruz<br>Biotechnology | SC-23876              |
| Cytokeratin18                                                | Santa Cruz<br>Biotechnology | sc-32329              |
| ZO-1                                                         | Santa Cruz<br>Biotechnology | SC-8146               |
| E-cadherin                                                   | BD Bioscience               | 610181                |
| Goat anti-mouse IgG-Alexa-488-conjugated secondary antibody  | Invitrogen                  | A-11001               |
| Goat anti-rabbit IgG-Alexa-555-conjugated secondary antibody | Invitrogen                  | A-21428               |

**Supplementary Table S4. Antibodies Used in This Study (Western blot analysis)**

| <b>Antibody</b> | <b>Vendor</b>               | <b>Product number</b> |
|-----------------|-----------------------------|-----------------------|
| Amylase         | Santa Cruz<br>Biotechnology | sc-46657              |
| AQP5            | Santa Cruz<br>Biotechnology | sc-9890               |
| Cytokeratin7    | Santa Cruz<br>Biotechnology | sc-23876              |
| Cytokeratin18   | Santa Cruz<br>Biotechnology | sc-32329              |
| LGR5            | Santa Cruz<br>Biotechnology | sc-68580              |
| CD90            | Abcam                       | ab133350              |
| Cytokeratin 5   | Abcam                       | ab128190              |
| NANOG           | Abcam                       | ab109250              |
| OCT             | Abcam                       | ab19857               |
| SOX2            | Abcam                       | ab97959               |
| $\beta$ -actin  | Santa Cruz<br>Biotechnology | sc-47778              |
